# Supplementary material
Source: PubMed Central journal article supplement (PMC3993157)
Supplement: AEM.04070-13_zam999105240so1.pdf [file AEM.04070-13_zam999105240so1.pdf]

## Supplementary files

Table S1. Diversity indices of pit-mud prokaryotic communities calculated based on the cutoff of 97% similarity of 16S rRNA gene sequence and 5652 reads per sample.

| No.    | Phylogenetic distance<br>whole tree | Chao1 estimator of<br>richness | Observed species | Shannon's diversity<br>index |
|--------|-------------------------------------|--------------------------------|------------------|------------------------------|
| 1yr-1  | 24.66±1.83                          | 332±19                         | 240±17           | 3.65±0.43                    |
| 1yr-2  | 25.62±3.92                          | 364±53                         | 244±32           | 3.04±0.56                    |
| 1yr-3  | 24.08±0.72                          | 361±21                         | 229±3            | 3.04±0.33                    |
| 1yr-4  | 26.56±1.33                          | 498±62                         | 277±23           | 3.97±0.59                    |
| 1yr-5  | 25.64±3.91                          | 462±108                        | 246±42           | 2.58±0.70                    |
| 10yr-1 | 25.92±1.77                          | 378±51                         | 237±15           | 5.30±0.27                    |
| 10yr-2 | 24.15±1.73                          | 309±44                         | 221±24           | 5.19±0.27                    |
| 10yr-3 | 25.23±2.71                          | 335±37                         | 217±39           | 4.57±0.76                    |
| 10yr-4 | 22.79±4.52                          | 297±78                         | 195±48           | 3.46±1.34                    |
| 10yr-5 | 26.53±4.14                          | 357±78                         | 236±43           | 4.96±0.23                    |
| 25yr-1 | 29.33±4.39                          | 361±75                         | 256±38           | 5.50±0.17                    |
| 25yr-2 | 31.85±2.42                          | 434±71                         | 286±26           | 5.73±0.28                    |
| 25yr-3 | 32.36±2.18                          | 516±36                         | 295±23           | 5.40±0.29                    |
| 25yr-4 | 32.29±0.72                          | 474±42                         | 293±13           | 5.64±0.18                    |
| 25yr-5 | 32.75±1.33                          | 500±53                         | 307±9            | 5.78±0.15                    |
| 50yr-1 | 31.23±1.50                          | 446±74                         | 270±17           | 5.16±0.02                    |
| 50yr-2 | 36.19±1.37                          | 515±44                         | 325±8            | 5.92±0.25                    |
| 50yr-3 | 32.43±2.13                          | 404±58                         | 290±26           | 5.64±0.15                    |
| 50yr-4 | 29.12±1.74                          | 354±47                         | 250±18           | 5.48±0.12                    |
| 50yr-5 | 27.80±3.74                          | 348±77                         | 240±42           | 5.30±0.16                    |

1yr-1 to 1yr-5 represent five replicates of pit-mud samples collected from 1-year-old cellars, 10yr-1 to 10yr-5 from 10-year-old cellars, 25yr-1 to 25yr-5 from 25-year-old cellars, 50yr-1 to 50yr-5 from 50-year-old cellars.

Table S2 The relative abundances of prokaryotic phyla in pit-mud samples with different cellar ages based on pyrosequencing data

| No.    | Firmicutes  | Bacteroidetes | Euryarchaeota | Spirochaetes | Actinobacteria | Chloroflexi | Synergistetes | Proteobacteria | WS1       | Tenericutes | Chlorobi  | Unclassified Bacteria |
|--------|-------------|---------------|---------------|--------------|----------------|-------------|---------------|----------------|-----------|-------------|-----------|-----------------------|
| 1yr-1  | 93.65±2.40  | 2.15±1.26     | 0.84±0.46     | 0.08±0.03    | 0.97±0.16      | 0.09±0.06   | 0.01±0.00     | 0.68±0.39      | 0.02±0.01 | 0.10±0.01   | 0.01±0.01 | 2.29±0.02             |
| 1yr-2  | 93.92±2.04  | 1.95±1.17     | 0.93±0.41     | 0.19±0.10    | 0.87±0.46      | 0.03±0.02   | 0.02±0.01     | 0.48±0.34      | 0.06±0.03 | 0.12±0.03   | 0.00±0.00 | 3.65±0.16             |
| 1yr-3  | 94.86±0.96  | 1.40±0.95     | 0.58±0.16     | 0.15±0.15    | 0.85±0.28      | 0.03±0.01   | 0.04±0.01     | 0.46±0.11      | 0.02±0.02 | 0.11±0.01   | 0.00±0.00 | 2.00±0.55             |
| 1yr-4  | 95.90±0.37  | 0.40±0.29     | 0.14±0.05     | 0.06±0.04    | 0.62±0.14      | 0.02±0.00   | 0.01±0.00     | 0.18±0.04      | 0.00±0.00 | 0.06±0.04   | 0.00±0.00 | 1.64±0.39             |
| 1yr-5  | 96.07±0.93  | 1.06±0.39     | 0.40±0.12     | 0.14±0.03    | 0.34±0.11      | 0.02±0.01   | 0.01±0.00     | 0.20±0.09      | 0.03±0.01 | 0.04±0.02   | 0.01±0.01 | 2.30±0.83             |
| 10yr-1 | 53.28±8.40  | 33.46±9.85    | 7.44±1.62     | 0.01±0.01    | 0.97±0.47      | 0.18±0.11   | 0.35±0.28     | 1.32±1.07      | 0.01±0.01 | 0.95±0.63   | 0.00±0.00 | 2.28±0.85             |
| 10yr-2 | 54.10±1.92  | 23.33±8.90    | 18.41±6.30    | 0.01±0.01    | 1.50±1.07      | 0.06±0.06   | 0.17±0.09     | 0.41±0.33      | 0.02±0.01 | 0.11±0.07   | 0.00±0.00 | 2.35±1.21             |
| 10yr-3 | 68.98±15.98 | 16.12±9.88    | 6.19±3.06     | 4.48±4.08    | 2.12±1.12      | 0.20±0.13   | 0.42±0.20     | 0.19±0.09      | 0.04±0.01 | 0.28±0.14   | 0.00±0.00 | 4.65±1.24             |
| 10yr-4 | 76.73±10.82 | 6.06±3.05     | 9.17±5.66     | 3.05±2.12    | 2.16±1.44      | 0.44±0.43   | 0.08±0.07     | 0.62±0.36      | 0.14±0.14 | 0.09±0.04   | 0.02±0.02 | 5.61±1.59             |
| 10yr-5 | 57.90±5.34  | 25.41±9.45    | 10.63±3.74    | 0.39±0.38    | 0.50±0.24      | 0.26±0.13   | 0.31±0.01     | 2.28±1.86      | 0.06±0.05 | 0.75±0.31   | 0.01±0.01 | 2.73±0.58             |
| 25yr-1 | 63.06±3.14  | 15.36±3.22    | 10.61±1.45    | 2.18±0.80    | 1.61±0.68      | 1.98±0.66   | 0.89±0.19     | 0.26±0.14      | 0.30±0.15 | 0.92±0.21   | 0.18±0.07 | 1.95±1.70             |
| 25yr-2 | 48.43±2.92  | 28.09±6.12    | 10.20±0.65    | 2.79±1.39    | 1.04±0.22      | 1.33±0.63   | 1.00±0.69     | 0.27±0.12      | 2.26±2.19 | 0.99±0.49   | 0.91±0.61 | 1.78±0.19             |
| 25yr-3 | 46.26±3.11  | 22.51±3.98    | 14.79±5.13    | 6.70±2.12    | 0.93±0.24      | 0.89±0.58   | 0.71±0.33     | 0.11±0.04      | 0.83±0.80 | 0.75±0.18   | 0.36±0.22 | 0.94±0.37             |
| 25yr-4 | 47.40±5.42  | 26.64±5.53    | 9.99±1.63     | 5.34±2.74    | 1.01±0.22      | 1.55±0.42   | 0.45±0.22     | 0.27±0.11      | 0.36±0.23 | 1.02±0.16   | 0.20±0.20 | 1.32±0.93             |
| 25yr-5 | 51.75±4.30  | 24.04±3.45    | 11.71±1.73    | 2.52±0.25    | 1.37±0.63      | 1.45±0.51   | 1.09±0.13     | 0.20±0.15      | 2.00±1.69 | 0.77±0.15   | 0.22±0.08 | 1.43±0.53             |
| 50yr-1 | 66.62±1.53  | 11.52±1.94    | 7.42±0.71     | 0.32±0.00    | 7.58±0.78      | 0.92±0.21   | 0.96±0.17     | 0.07±0.03      | 1.49±1.01 | 0.42±0.07   | 0.14±0.06 | 1.40±0.28             |
| 50yr-2 | 40.19±6.84  | 20.13±3.83    | 15.56±2.51    | 4.16±1.61    | 4.71±1.83      | 4.88±2.39   | 2.16±0.80     | 1.02±0.21      | 0.78±0.41 | 0.90±0.42   | 0.73±0.32 | 1.43±0.53             |
| 50yr-3 | 44.82±4.20  | 26.50±5.62    | 12.71±1.19    | 5.55±3.27    | 1.09±0.62      | 4.20±1.03   | 0.59±0.23     | 1.04±0.79      | 0.25±0.13 | 0.64±0.08   | 0.00±0.00 | 1.47±0.19             |
| 50yr-4 | 50.11±4.31  | 23.15±5.17    | 10.82±1.01    | 5.43±2.80    | 3.30±2.45      | 1.74±0.30   | 0.77±0.47     | 0.69±0.42      | 1.60±1.03 | 0.41±0.07   | 0.05±0.05 | 2.58±0.88             |
| 50yr-5 | 62.11±2.76  | 11.92±1.98    | 16.64±5.08    | 1.38±0.39    | 2.74±0.39      | 0.84±0.53   | 0.93±0.48     | 0.12±0.04      | 0.06±0.03 | 0.76±0.05   | 0.04±0.04 | 1.66±0.63             |

Table S3. Pearson's correlation coefficients between the relative abundances of prokaryotic phyla or genera and environmental variables.

|                                     | moisture | pH      | NH <sub>4</sub> <sup>+</sup> | Humic acid | TN     | acetate | butyrate | caproate | lactate  |
|-------------------------------------|----------|---------|------------------------------|------------|--------|---------|----------|----------|----------|
| <b><i>Firmicutes</i></b>            | -0.153   | -.748** | -.580**                      | .402**     | -0.194 | 0.172   | .540**   | -0.178   | .883**   |
| <i>Lactobacillus</i>                | -0.25    | -.658** | -.628**                      | .281*      | -.269* | -0.035  | .387**   | -.355**  | .892**   |
| <i>Clostridium IV</i>               | -0.04    | -0.036  | 0.226                        | -0.098     | -0.08  | .406**  | 0.234    | .380**   | -0.216   |
| <i>Sedimentibacter</i>              | 0.154    | .596**  | .258*                        | -0.164     | 0.138  | -0.203  | -.392**  | 0.059    | -.622**  |
| <i>Syntrophomonas</i>               | 0.198    | .512**  | .271*                        | -0.058     | 0.199  | -0.185  | -.329*   | 0.07     | -.559**  |
| <i>unclassified</i>                 |          |         |                              |            |        |         |          |          |          |
| <i>Clostridiaceae 1</i>             | 0.111    | -0.215  | .348**                       | 0.034      | 0.061  | .491**  | 0.145    | .657**   | -0.195   |
| <i>Unclassified anaerobranaceae</i> | 0.252    | .369**  | .617**                       | -0.2       | 0.353* | 0.185   | -0.228   | 0.449**  | -0.561** |
| <b><i>Bacteroidetes</i></b>         | 0.155    | .752**  | .409**                       | -.338**    | 0.132  | -0.204  | -.485**  | 0.016    | -.788**  |
| <i>Petrimonas</i>                   | 0.178    | .709**  | .461**                       | -.348**    | 0.164  | -0.098  | -.411**  | 0.083    | -.760**  |
| <i>unclassified</i>                 |          |         |                              |            |        |         |          |          |          |
| <i>Porphyromonadaceae</i>           | 0.011    | .599**  | 0.151                        | -.350**    | -0.047 | -0.203  | -.423**  | -0.041   | -.601**  |
| <b><i>Euryarchaeota</i></b>         | 0.19     | .411**  | .509**                       | -0.239     | .297*  | -0.05   | -.297*   | .305*    | -.572**  |
| <i>Methanobacterium</i>             | 0.078    | 0.084   | .266*                        | -.262*     | 0.148  | -0.074  | -0.168   | 0.217    | -0.157   |
| <i>Methanoculleus</i>               | 0.096    | 0.204   | 0.097                        | 0.002      | 0.179  | -0.018  | -0.087   | 0.094    | -0.202   |
| <i>Methanosarcina</i>               | 0.102    | .376**  | .466**                       | -0.214     | 0.13   | -0.072  | -.284*   | 0.157    | -.516**  |

\*\* Correlation is significant at p<0.01. \* Significant at p<0.05.

## Figures

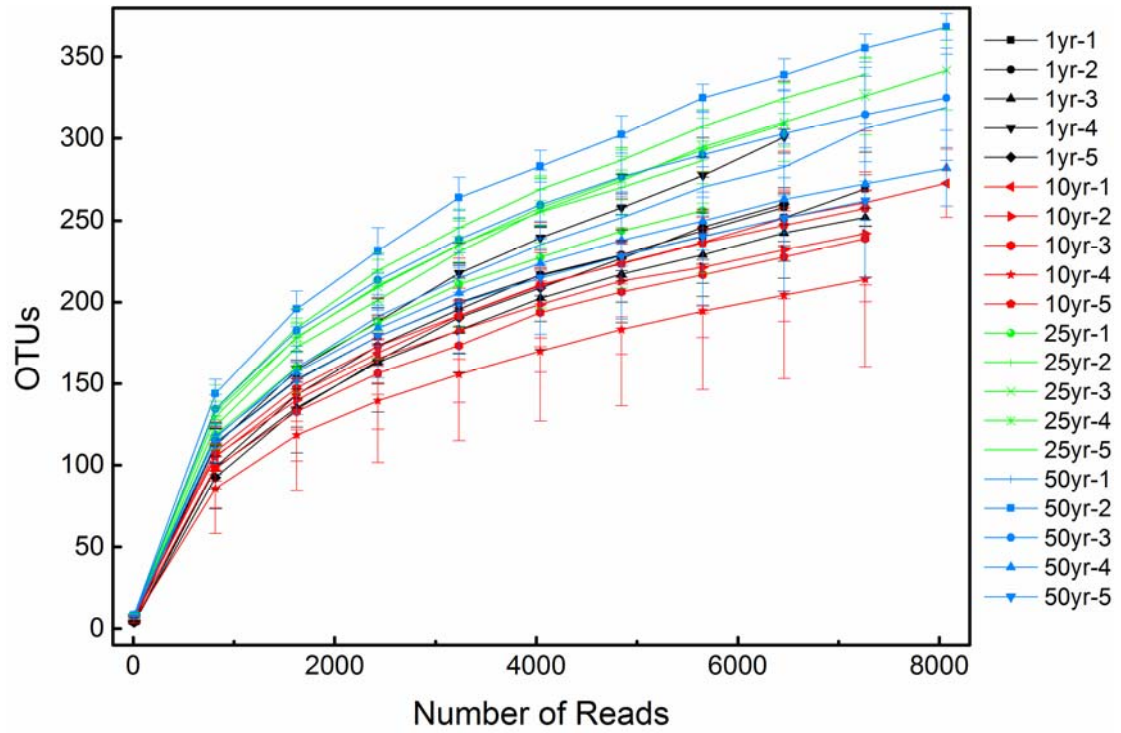

**Figure S1** Rarefaction curves based on the OTUs at the cutoff of 97% 16S rRNA sequence similarity.

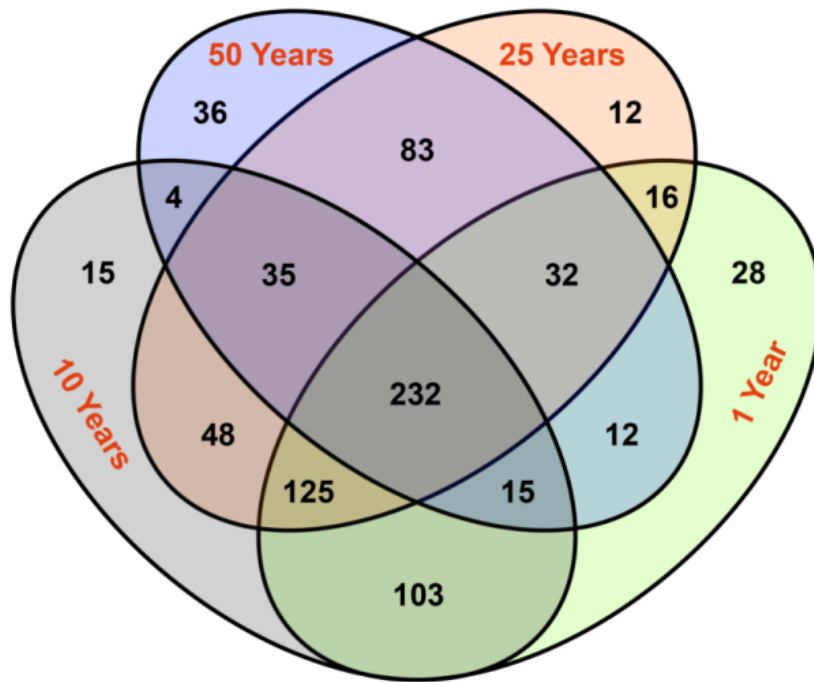

**Figure S2** Unique and shared OTUs found in pit-mud samples. The parenthetical numbers indicate total OTUs in each treatment group; numbers in the Venn diagram indicate unique (non-overlapping panels) and shared (overlapping panels) OTUs. Only those OTUs containing  $\geq 5$  sequences were considered to be valid OTUs. A total of 796 OTUs were detected in this study.

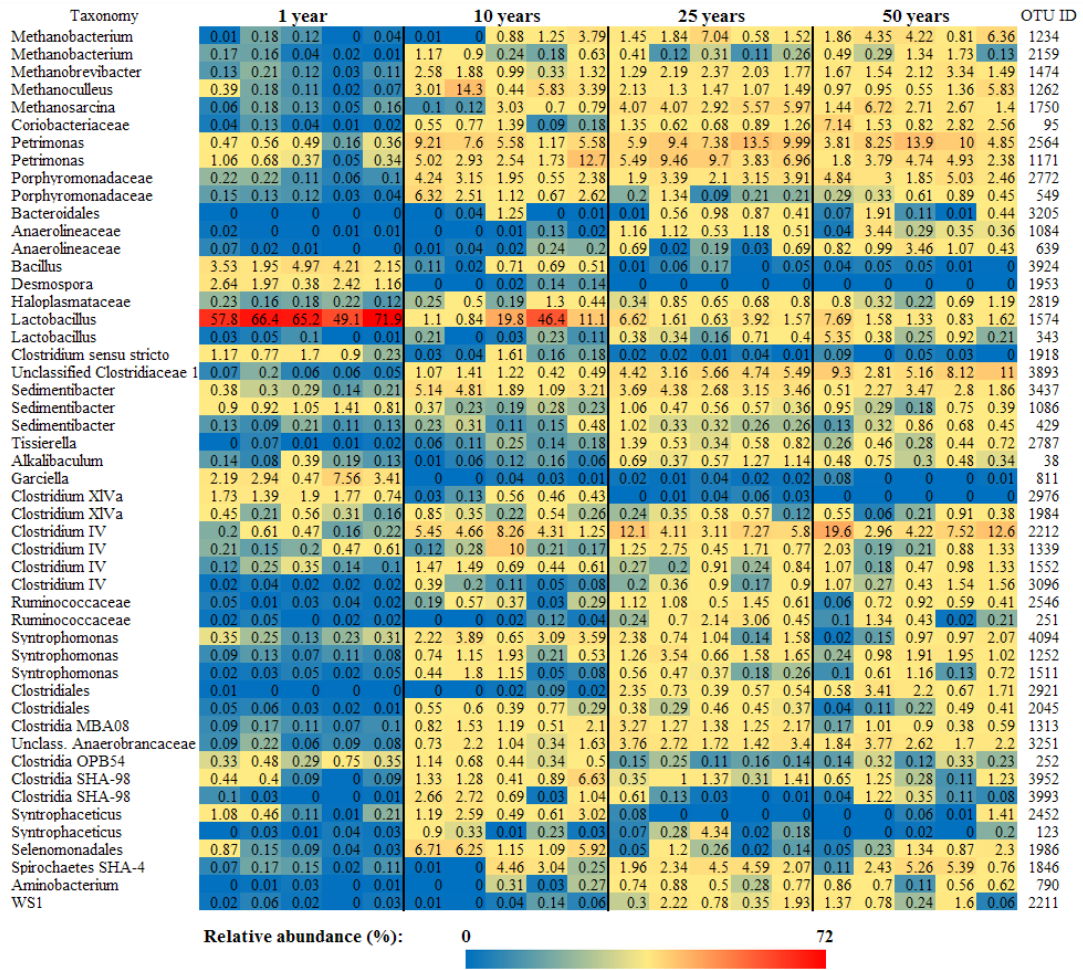

**Figure S3** Heat map of the relative abundances of most abundant 50 genera in pit-mud samples. The color intensity (log scale) in each panel shows the percentage of a genus in a sample, referring to color key at the right bottom.

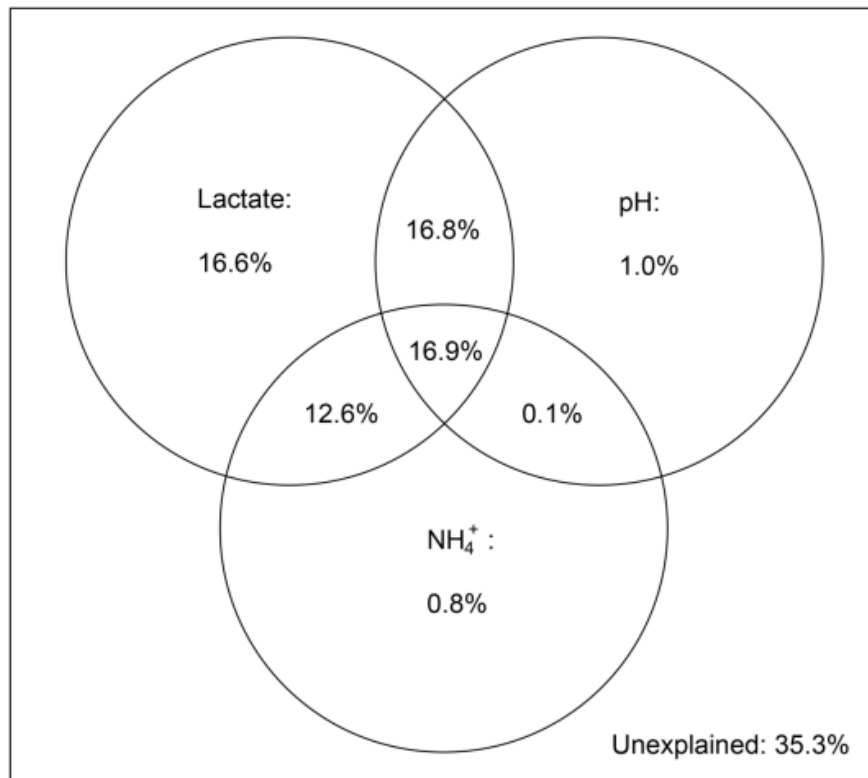

**Figure S4** Contributions of different environmental factors to the variation of prokaryotic community structure in pit-mud samples by VPA analysis. Each diagram represents the biological variation partitioned into the relative contribution of each factor or a combination of multiple factors. The edge represents the variation explained by each factor alone. The overlaps represent interactions of any two factors, and the middle of overlap represents the interaction of all three factors.
